# Supplementary material for: A sensitive AIEE probe for amphiphilic compounds
Source: Royal Society of Chemistry journal article supplement (doi:10.1039/c5nj02398j), 2016-01-01
Supplement: c5nj02398j1.pdf [file c5nj02398j1.pdf]

**Electronic Supporting information**

**A Sensitive AIEE Probe for Amphiphilic Compounds**

Veerabhadraiah Palakollu<sup>1</sup>, Anuji K. Vasu<sup>1</sup>, Vijay Thiruvengatam<sup>2</sup> and Sriram Kanvah<sup>1\*</sup>

<sup>1</sup>Department of Chemistry, Indian Institute of Technology Gandhinagar, Indian Institute of Technology Gandhinagar, Ahmedabad-382424, India. E-mail: \*[kanvah@gatech.edu](mailto:kanvah@gatech.edu)

<sup>2</sup>Department of Biological Engineering, Indian Institute of Technology Gandhinagar, Ahmedabad 382424, e-mail [vijay@iitgn.ac.in](mailto:vijay@iitgn.ac.in)

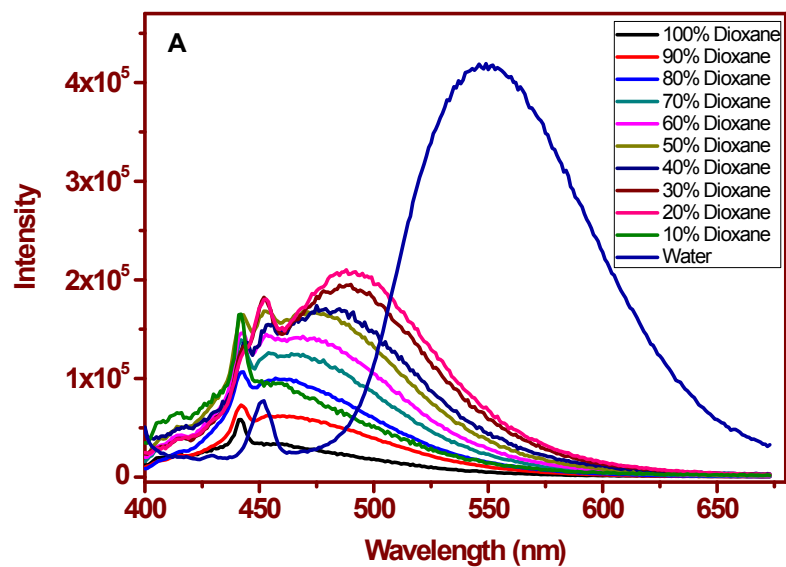

**Figure S1.** Aggregation induced enhanced emission of Stilbene-1 as examined using dioxane-water binary mixture. (This figure was earlier published from our group in New Journal of Chemistry 38 (2014) 5736-5746 and is included for reader benefit)

**Table S1:** Crystal data and structure refinement for stilbene (**1**)

|                                   |                                             |
|-----------------------------------|---------------------------------------------|
| Identification code               | EXP2                                        |
| Empirical formula                 | C17 H16 N2 O                                |
| Formula weight                    | 264.32                                      |
| Temperature                       | 293(2) K                                    |
| Wavelength                        | 1.54184 Å                                   |
| Crystal system                    | Orthorhombic                                |
| Space group                       | Pnma                                        |
| Unit cell dimensions              | a = 16.9790(10) Å, $\alpha = 90^\circ$ .    |
|                                   | b = 10.3445(9) Å, $\beta = 90^\circ$ .      |
|                                   | c = 15.9847(10) Å, $\gamma = 90^\circ$ .    |
| Volume                            | 2807.5(3) Å <sup>3</sup>                    |
| Z                                 | 8                                           |
| Density (calculated)              | 1.251 Mg/m <sup>3</sup>                     |
| Absorption coefficient            | 0.624 mm <sup>-1</sup>                      |
| F(000)                            | 1120                                        |
| Crystal size                      | 0.5 x 0.2 x 0.3 mm <sup>3</sup>             |
| Theta range for data collection   | 3.798 to 65.970°.                           |
| Index ranges                      | -20 ≤ h ≤ 19, -12 ≤ k ≤ 8, -18 ≤ l ≤ 16     |
| Reflections collected             | 6681                                        |
| Independent reflections           | 3479 [R(int) = 0.0396]                      |
| Completeness to theta = 65.970°   | 99.0 %                                      |
| Refinement method                 | Full-matrix least-squares on F <sup>2</sup> |
| Data / restraints / parameters    | 3479 / 1 / 369                              |
| Goodness-of-fit on F <sup>2</sup> | 1.130                                       |
| Final R indices [I > 2σ(I)]       | R1 = 0.0566, wR2 = 0.1344                   |
| R indices (all data)              | R1 = 0.0609, wR2 = 0.1407                   |
| Absolute structure parameter      | -0.3(5)                                     |
| Extinction coefficient            | 0.0052(6)                                   |
| Largest diff. peak and hole       | 0.270 and -0.301 e.Å <sup>-3</sup>          |
| CCDC number                       | 1031951                                     |

Intermolecular H-bonding interaction table:

| Donor-Hydrogen...Acceptor | Don-Hyd [Å] | Hyd-Acc [Å] | Don-Acc [Å] | D-H...A [o] |
|---------------------------|-------------|-------------|-------------|-------------|
| O18-H18...N20A            | 0.82        | 2.04        | 2.836       | 163.4°      |

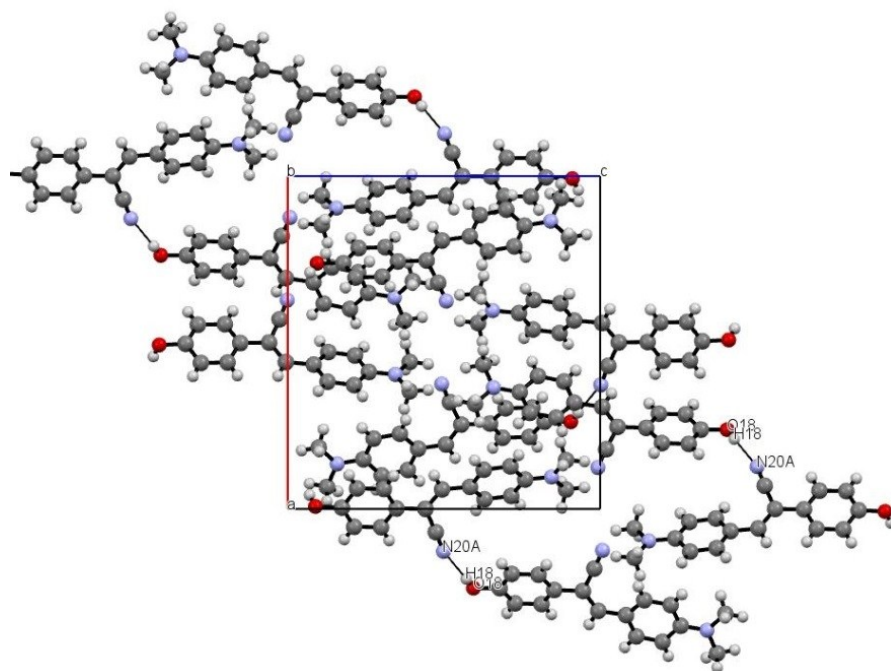

**Figure S2.** Packing diagram of stilbene (**1**) showing the crystallographic symmetry molecules with the glide plane and  $2_1$  screw axis along the symmetric equivalent positions a)  $1/2+x,y,1/2-z$  "Glide plane perpendicular to  $[0, 0, 1]$  with glide component  $[1/2, 0, 0]$ "; b)  $1/2-x,1/2+y,1/2+z$  "Glide plane perpendicular to  $[1, 0, 0]$  with glide component  $[0, 1/2, 1/2]$ "; c)  $-x,1/2+y,-z$  "2-fold screw axis with direction  $[0, 1, 0]$  at  $0, y, 0$  with screw component  $[0, 1/2, 0]$ ". The dotted lines indicate intermolecular contacts.

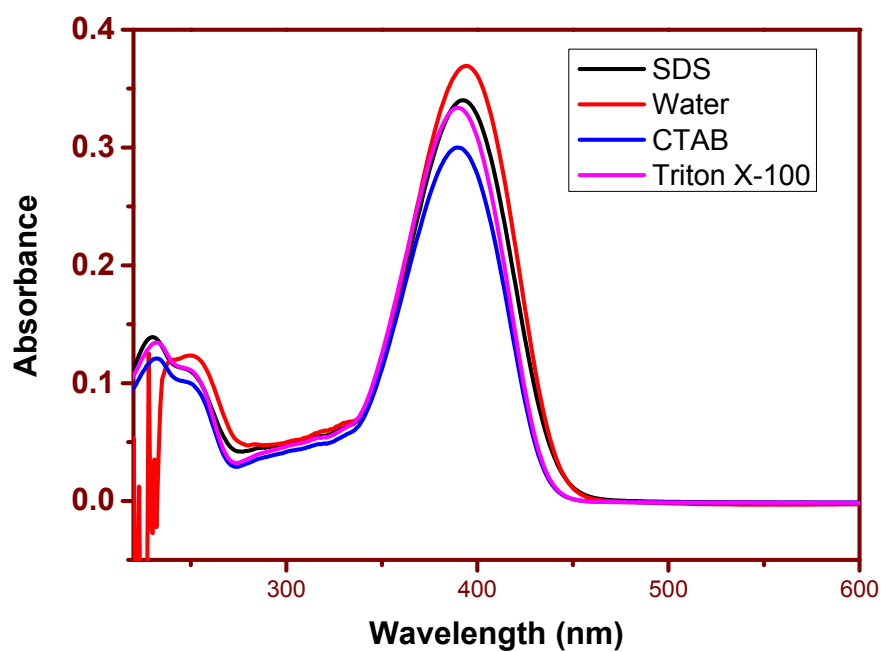

**Figure S3:** Absorption spectra of stilbene (**1**) in SDS ( $1 \times 10^{-3}\text{M}$ ); Triton X-100 ( $5 \times 10^{-5}\text{M}$ ) and CTAB ( $2 \times 10^{-4}\text{M}$ )

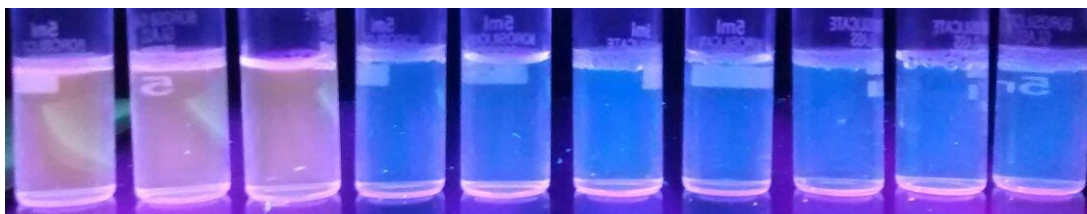

**Figure S4:** Color changes as observed using hand-held UV lamp. Clear demarcation is only seen when the micelles are formed. At above or below the CMC, the colours are uniform.

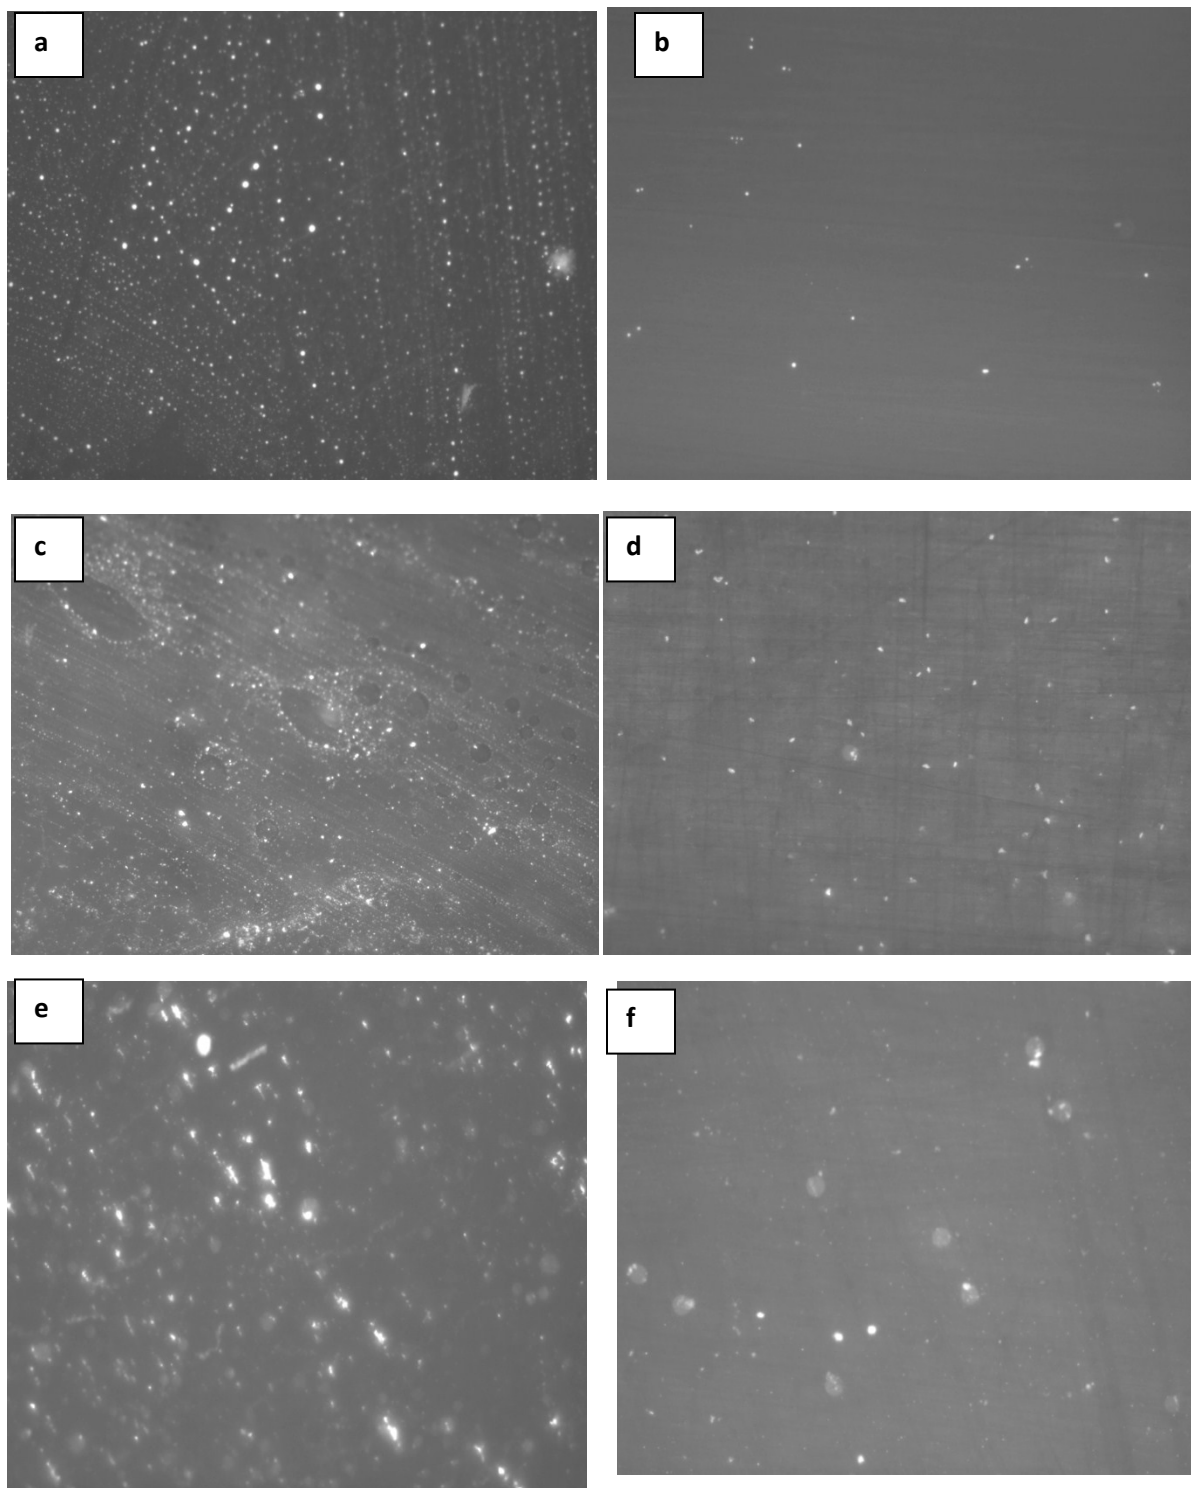

**Figure S5.** Fluorescence microscope images of stilbene (**1**) in SDS a)  $1 \times 10^{-3}\text{M}$  b)  $15 \times 10^{-3}\text{M}$ ; Triton X-100 c)  $(5 \times 10^{-5}\text{M})$  d)  $7 \times 10^{-4}\text{M}$ ; CTAB e)  $2 \times 10^{-4}$  f)  $15 \times 10^{-4}$ . The observed intensity changes are SDS (94 to 50), CTAB (73 to 60) and in Triton X-100 (93 to 46)].

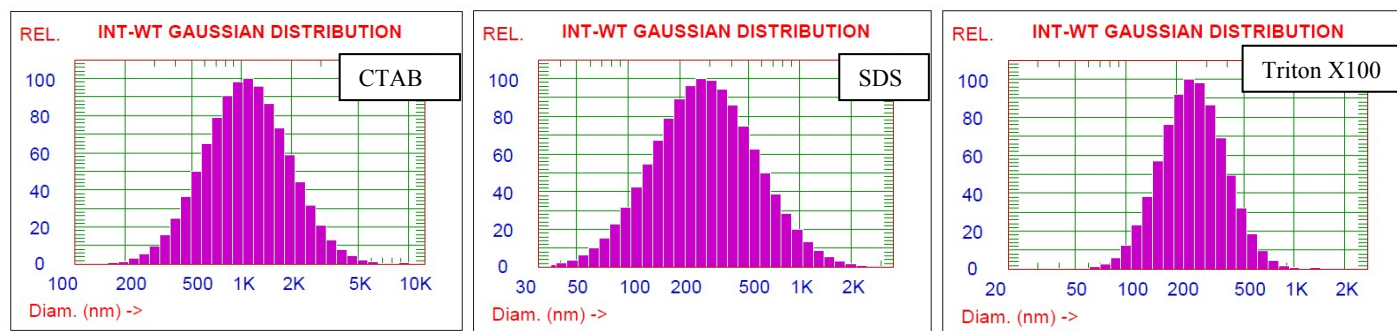

| Surfactant                   | Particle Size Below CMC (nm) | Particle Size Above CMC (nm) |
|------------------------------|------------------------------|------------------------------|
| SDS                          | 354                          | 35188.6                      |
| Triton X-100                 | 274.3                        | 1793.5                       |
| CTAB                         | 1266.3                       | 42558.8                      |
| In Distilled Water =2234.1nm |                              |                              |

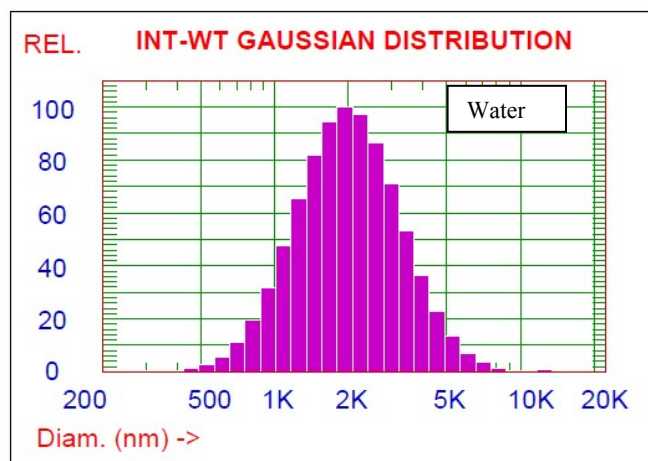

**Figure S6.** Particle size distribution of stilbene (**1**) in surfactants at below CMC and in water below CMC.

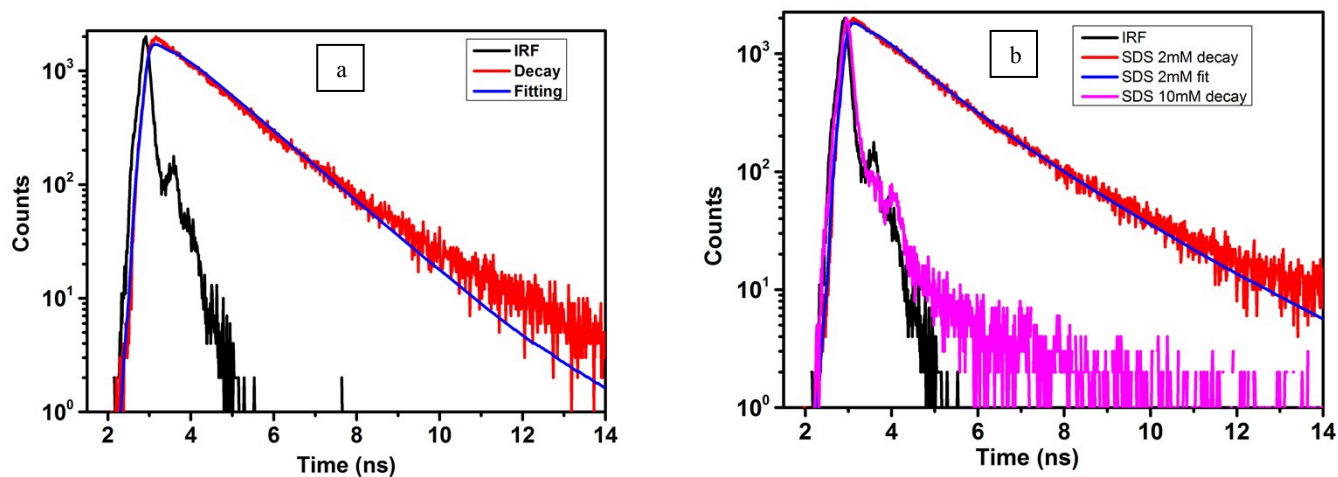

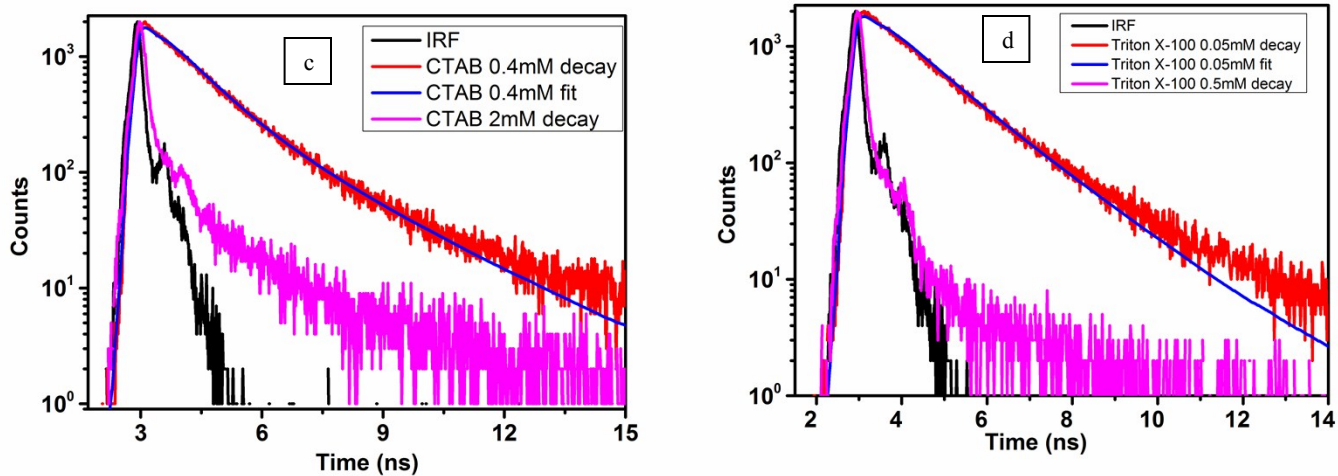

**Figure S7.** Decay profile of stilbene (**1**) **a**) in water, **b**) SDS, **c**) CTAB and **d**) Triton X-100

**Table S2:** Fluorescence lifetime data of stilbene in water and surfactant media

| Media                  | $\tau_1$ (ns) | $\tau_2$ (ns) | $\chi^2$ |
|------------------------|---------------|---------------|----------|
| Water                  | 1.40          |               | 1.075    |
| SDS (2 mM)             | 0.95 (42.40%) | 2.03 (57.60%) | 1.013    |
| CTAB (0.4 mM)          | 0.95 (58.87%) | 2.40 (41.13%) | 1.005    |
| Triton X-100 (0.05 mM) | 0.92 (32.15%) | 1.65 (67.85%) | 1.061    |
